# Supplementary material for: NSUN2-mediated m5C modification of SOCS3 mRNA modulates macrophage polarization in bladder cancer
Source: Research Square preprint supplement (doi:10.21203/rs.3.rs-6766889/v1), 2025-06-30
Supplement: Supplementary file 1 [file 2d5cfa2ff09234bce3fe6f94.docx]

Figure2---A (RAW+BMDM)


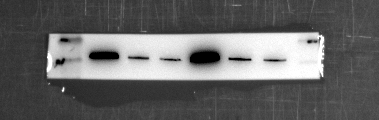


NSUN2


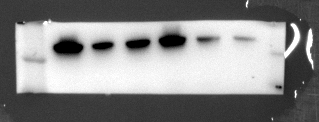


ARG-1


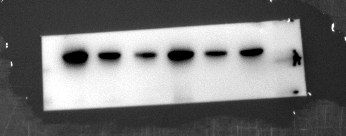


IL-10


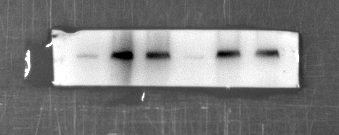


TNF-α


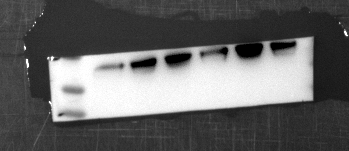


iNOS


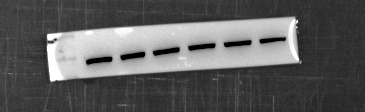


GAP

Figure2---A (THP-1+PBMC)


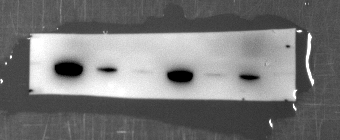


NSUN2


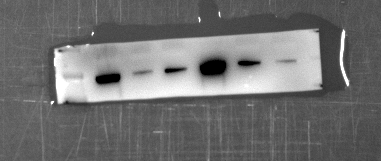


ARG-1


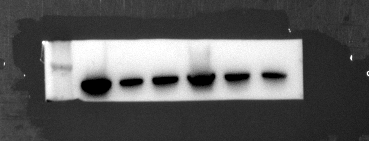


IL-10


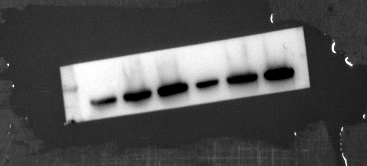


TNF-α


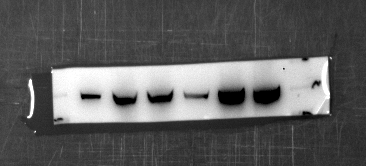


Inos


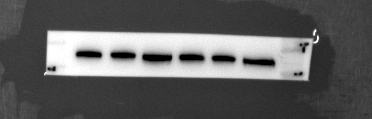
GAPDH

Figure2---D(RAW+BMDM)


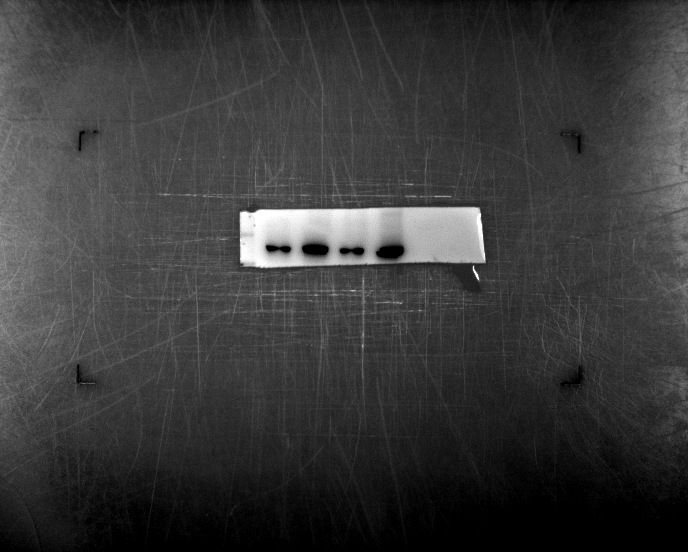


NSUN2


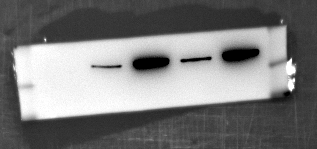


ARG-1


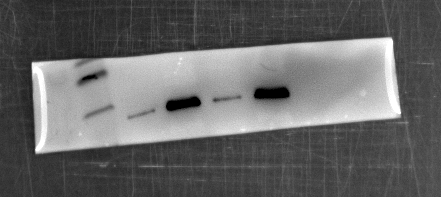


IL-10


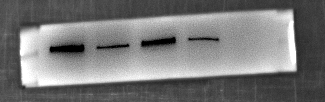


TNF-α


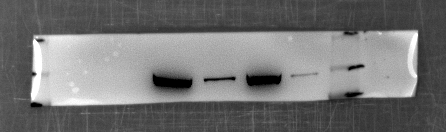


iNOS


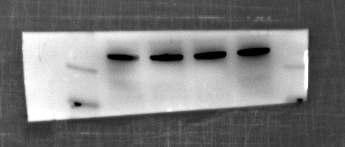


GAPDH

Figure2---D (THP-1+PBMC)


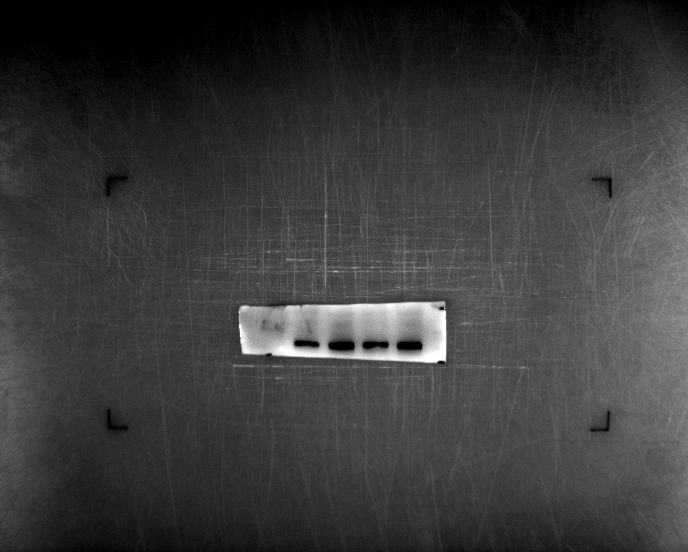


NSUN2


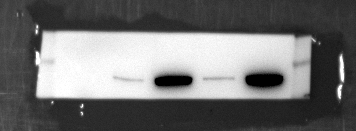


ARG-1


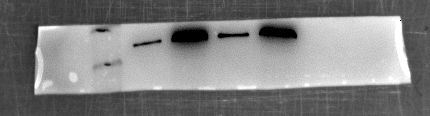


IL-10


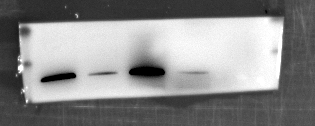


TNF-α


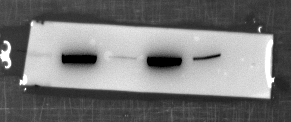


iNOS


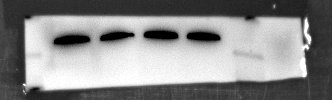


GAPDH

Figure3---D (RAW+BMDM)


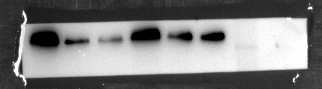


NSUN2


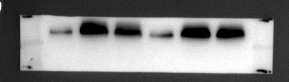


SOCS3


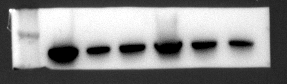


JAK2


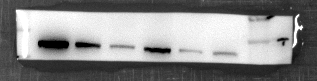


STAT3


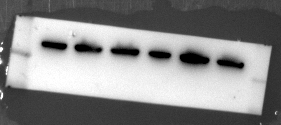


GAPDH

Figure3---D (THP-1+PBMC)


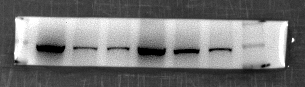


NSUN2


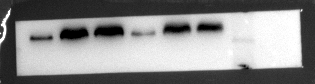


SOCS3


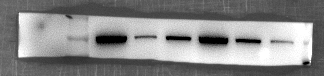


JAK2


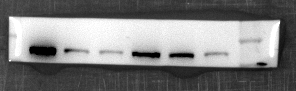


STAT3


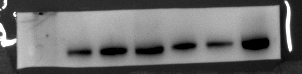


GAPDH

Figure4---A(RAW+BMDM)


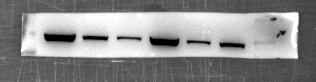


NSUN2


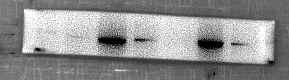


SOCS3


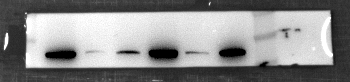


JAK2


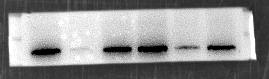


STAT3


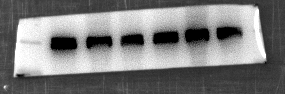


GAPDH

Figure4---A (THP-1+PBMC)


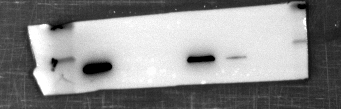


NSUN2


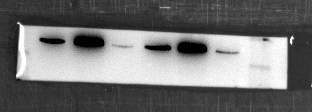


SOCS3


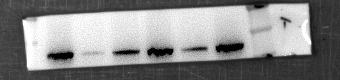


JAK2


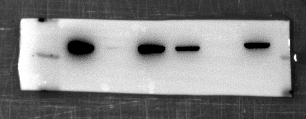


STAT3


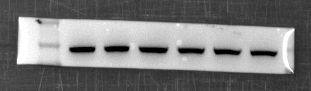


GAPDH

Figure4---C(RAW+BMDM)


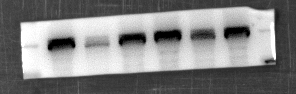


ARG-1


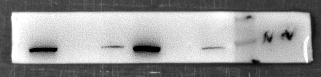


IL-10


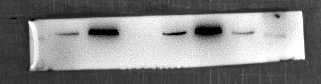


TNF-α


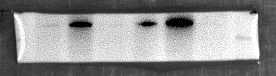


iNOS


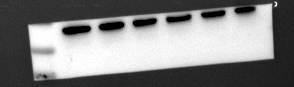


GAPDH

Figure4---C (THP-1+PBMC)


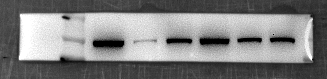


ARG-1


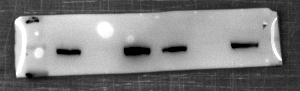


IL-10


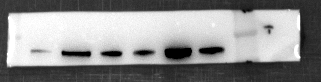


TNF-α


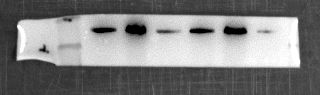


Inos


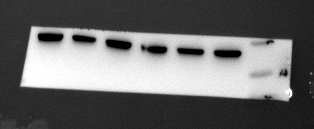


GAPDH

Figure5---A


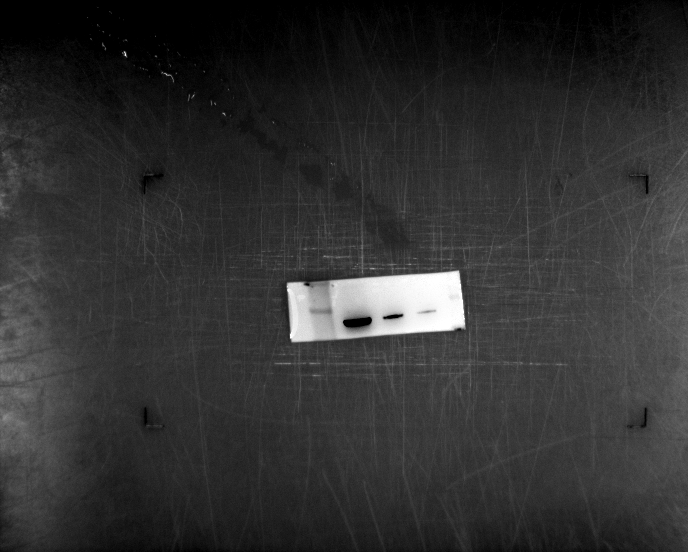


NSUN2


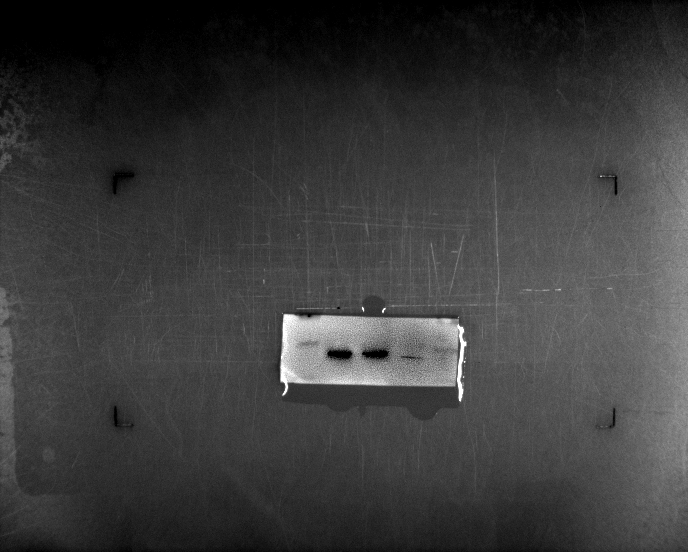


SOCS3


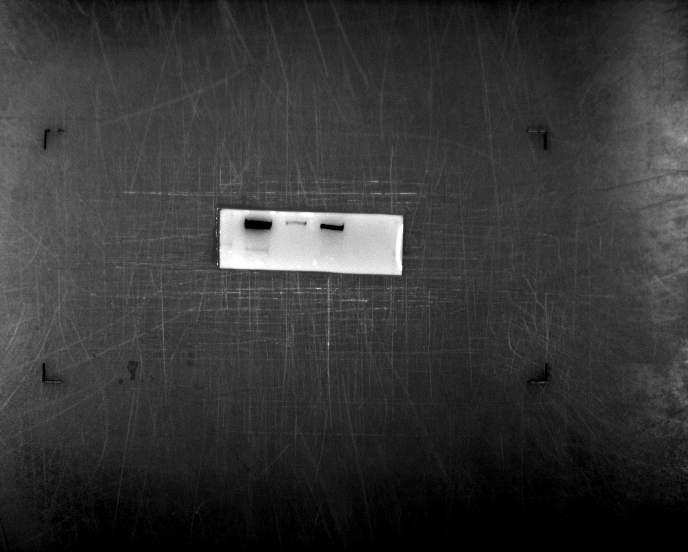


ARG-1


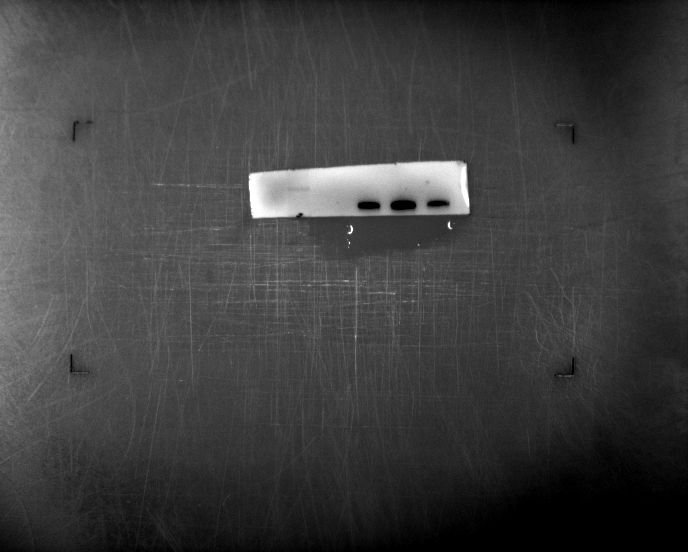


TNF-α


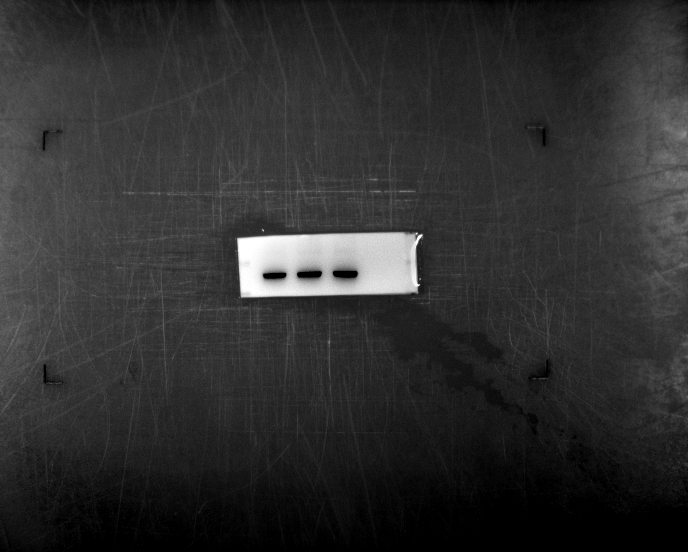


GAP

Figure7---D


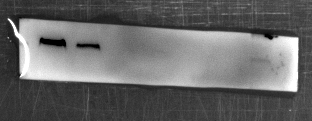


THP-1


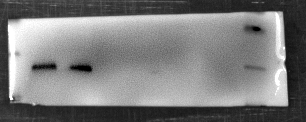


PBMC

Figure8---A


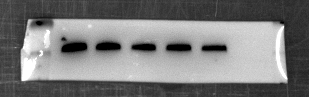


site1-input


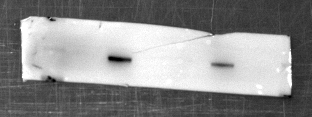


site1-output

Figure8---D-- siYBX1 group (RAW+BMDM)


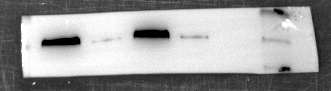


YBX1


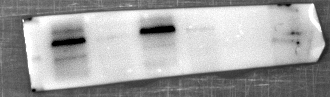


ARG-1


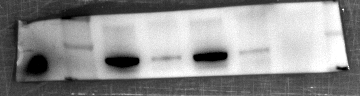


IL-10


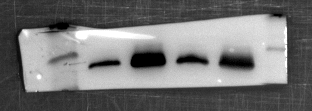


TNF-α


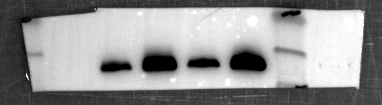


Inos


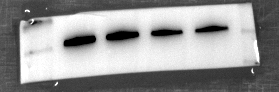


GAPDH

Figure8---D-- siYBX1 group (THP-1+PBMC)


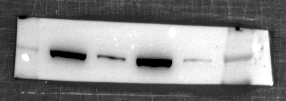


YBX1


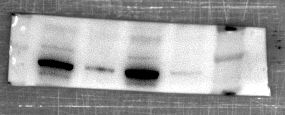


ARG-1


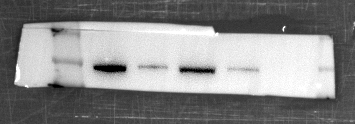


IL-10


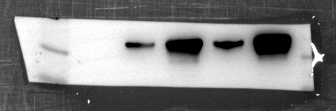


TNF-α


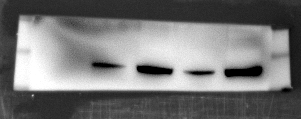


iNOS


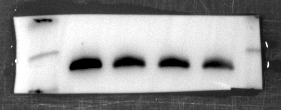


GAPDH

Figure8---D-- siTET2 group (RAW+BMDM)


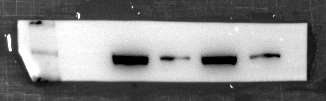


TET2


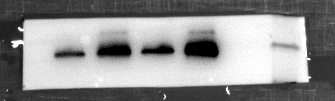


ARG-1


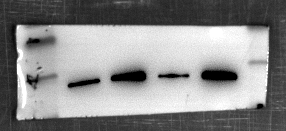


IL-10


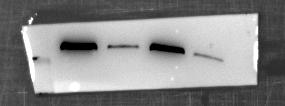


TNF-α


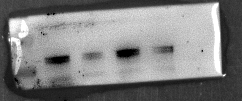


INOS


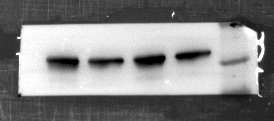


GAPDH

Figure8---D-- siTET2 group (THP-1+PBMC)


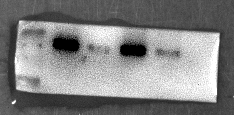


TET2


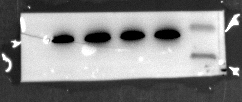


ARG-1


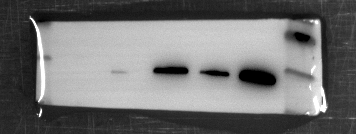


IL-10


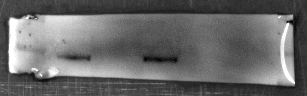


TNF-α


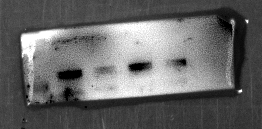


INOS


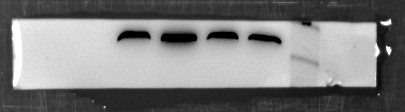


GAPDH
