# Supplementary material for: NSUN2-mediated m5C modification of SOCS3 mRNA modulates macrophage polarization in bladder cancer
Source: Research Square preprint supplement (doi:10.21203/rs.3.rs-6766889/v1), 2025-06-30
Supplement: Supplementary file 2 [file 8c63214f43a6c3aa6396f501.docx]

| Antibody | Company | Catalogue number | Dilution | RRID |
| --- | --- | --- | --- | --- |
| NSUN2 | CST | E9Y5E | 1:1000 |  |
| GAPDH | CST | D16H11 | 1:5000 |  |
| SOCS3 | CST | D6E1T | 1:1000 |  |
| β-Actin | CST | 13E5 | 1:5000 |  |
| Arginase-1 | CST | D4E3M | 1:1000 |  |
| IL-10 | Abcam | ab310329 | 1:1000 |  |
| IL-10 | Abcam | ab133575 | 1:1000 |  |
| TNF-α | CST | 3707 | 1:1000 |  |
| iNOS | CST | D6B6S | 1:1000 |  |
| JAK2 | CST | D2E12 | 1:1000 |  |
| STAT3 | CST | 124H6 | 1:1000 |  |
| YBX1 | Thermo Fisher | 9J7M4 | 1:1000 |  |
| ALYREF | Abcam | ab202894 | 1:1000 |  |
| TET1 | Abcam | ab191698 | 1:1000 |  |
| TET2 | Abcam | ab213369 | 1:1000 |  |
| TET3 | Abcam | ab231785 | 1:1000 |  |

***Table S1 Details of used antibodies***

| Gene name | Forward sequence (5' -> 3') | Reverse sequence (5' -> 3') |
| --- | --- | --- |
| NSUN2 | GGGTTGCTATCACTCTCTATGC | TTTCTTGTCTGTTGCCGTAGTT |
| Nsun2 | CTCTGTTCAGCTATTGGACGC | TGGCACTCCCAAACATAATTTGA |
| GAPDH | GGAGCGAGATCCCTCCAAAAT | GGCTGTTGTCATACTTCTCATGG |
| Gapdh | AGGTCGGTGTGAACGGATTTG | GGGGTCGTTGATGGCAACA |
| ARG-1 | GTGGAAACTTGCATGGACAA | AATCCTGGCACATCGGGAATC |
| Arg-1 | CTCCAAGCCAAAGTCCTTAGAG | GGAGCTGTCATTAGGGACATCA |
| IL-10 | GACTTTAAGGGTTACCTGGGTTG | TCACATGCGCCTTGATGTCTG |
| Il-10 | CTTACTGACTGGCATGAGGATCA | GCAGCTCTAGGAGCATGTGG |
| TNF-α | CCTCTCTCTAATCAGCCCTCTG | GAGGACCTGGGAGTAGATGAG |
| Tnf-α | CAGGCGGTGCCTATGTCTC | CGATCACCCCGAAGTTCAGTAG |
| iNOS | TTCAGTATCACAACCTCAGCAAG | TGGACCTGCAAGTTAAAATCCC |
| iNos | GTTCTCAGCCCAACAATACAAGA | GTGGACGGGTCGATGTCAC |

***Table S2 Details of used primers.***

| Gene name | Sense (5' -> 3') | Anti-sense (5' -> 3') |
| --- | --- | --- |
| NSUN2 | GCGAUGCCUUAGGAUAUUATT | UAAUAUCCUAAGGCAUCGCTT |
| Nsun2 | GCCUGGCAUACAAACUUAATT | UUAAGUUUGUAUGCCAGGCTT |
| SOCS3 | AACAAGUUCCGUUGGAAAGUU | CUUUCCAACGGAACUUGUUUG |
| Socs3 | UCUUGUAAUGUUUAGUCACUA | GUGACUAAACAUUACAAGAAG |
| YBX1 | UUUUACUGUUCCCAAAACCUU | GGUUUUGGGAACAGUAAAAUG |
| Ybx1 | UUACAUUGAACCAUUUGACUG | GUCAAAUGGUUCAAUGUAAGG |
| TET2 | AUAAUAACUUUUGAAAGAGUG | CUCUUUCAAAAGUUAUUAUGG |
| Tet2 | AUUCAUAAGGCAGUUUGACGU | GUCAAACUGCCUUAUGAAUAU |

***Table S3 effective sequences of used siRNA.***

***
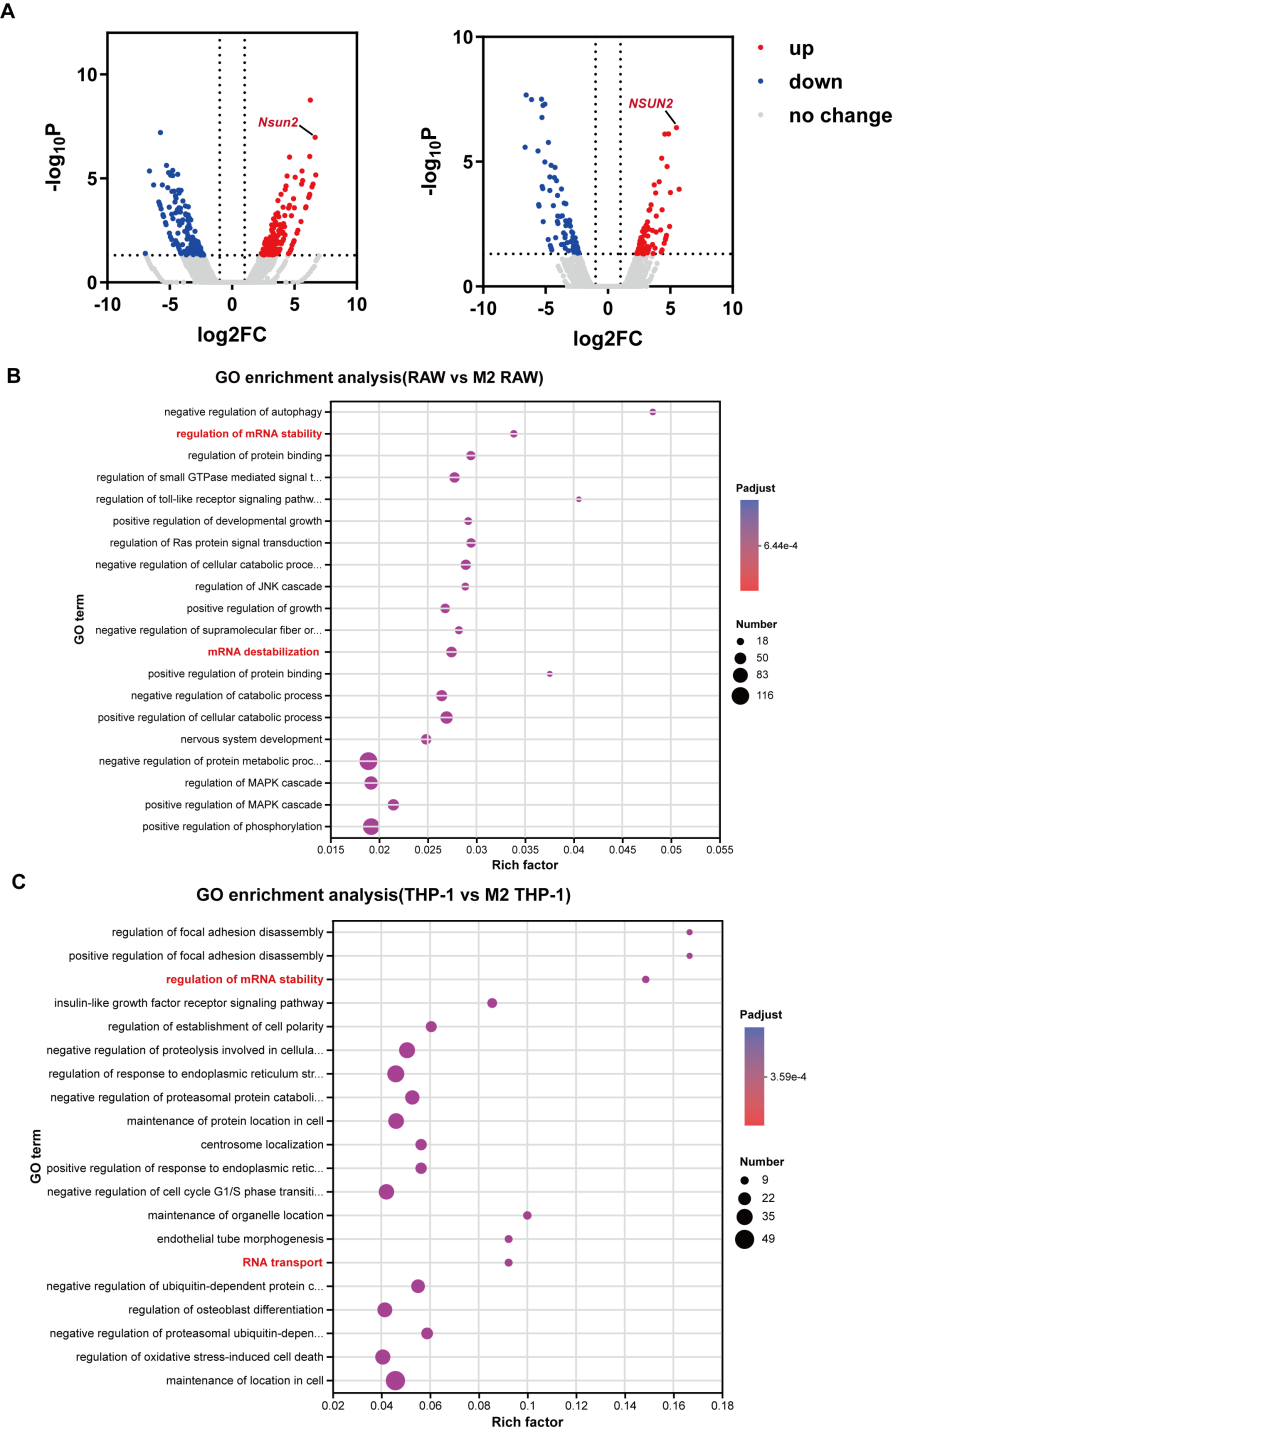
***

***Figure S1 NSUN2 was commonly upregulated in M2 macrophages compared with M0 macrophages (A) and NSUN2-related pathways were enriched in GO analysis (B-C).***

***
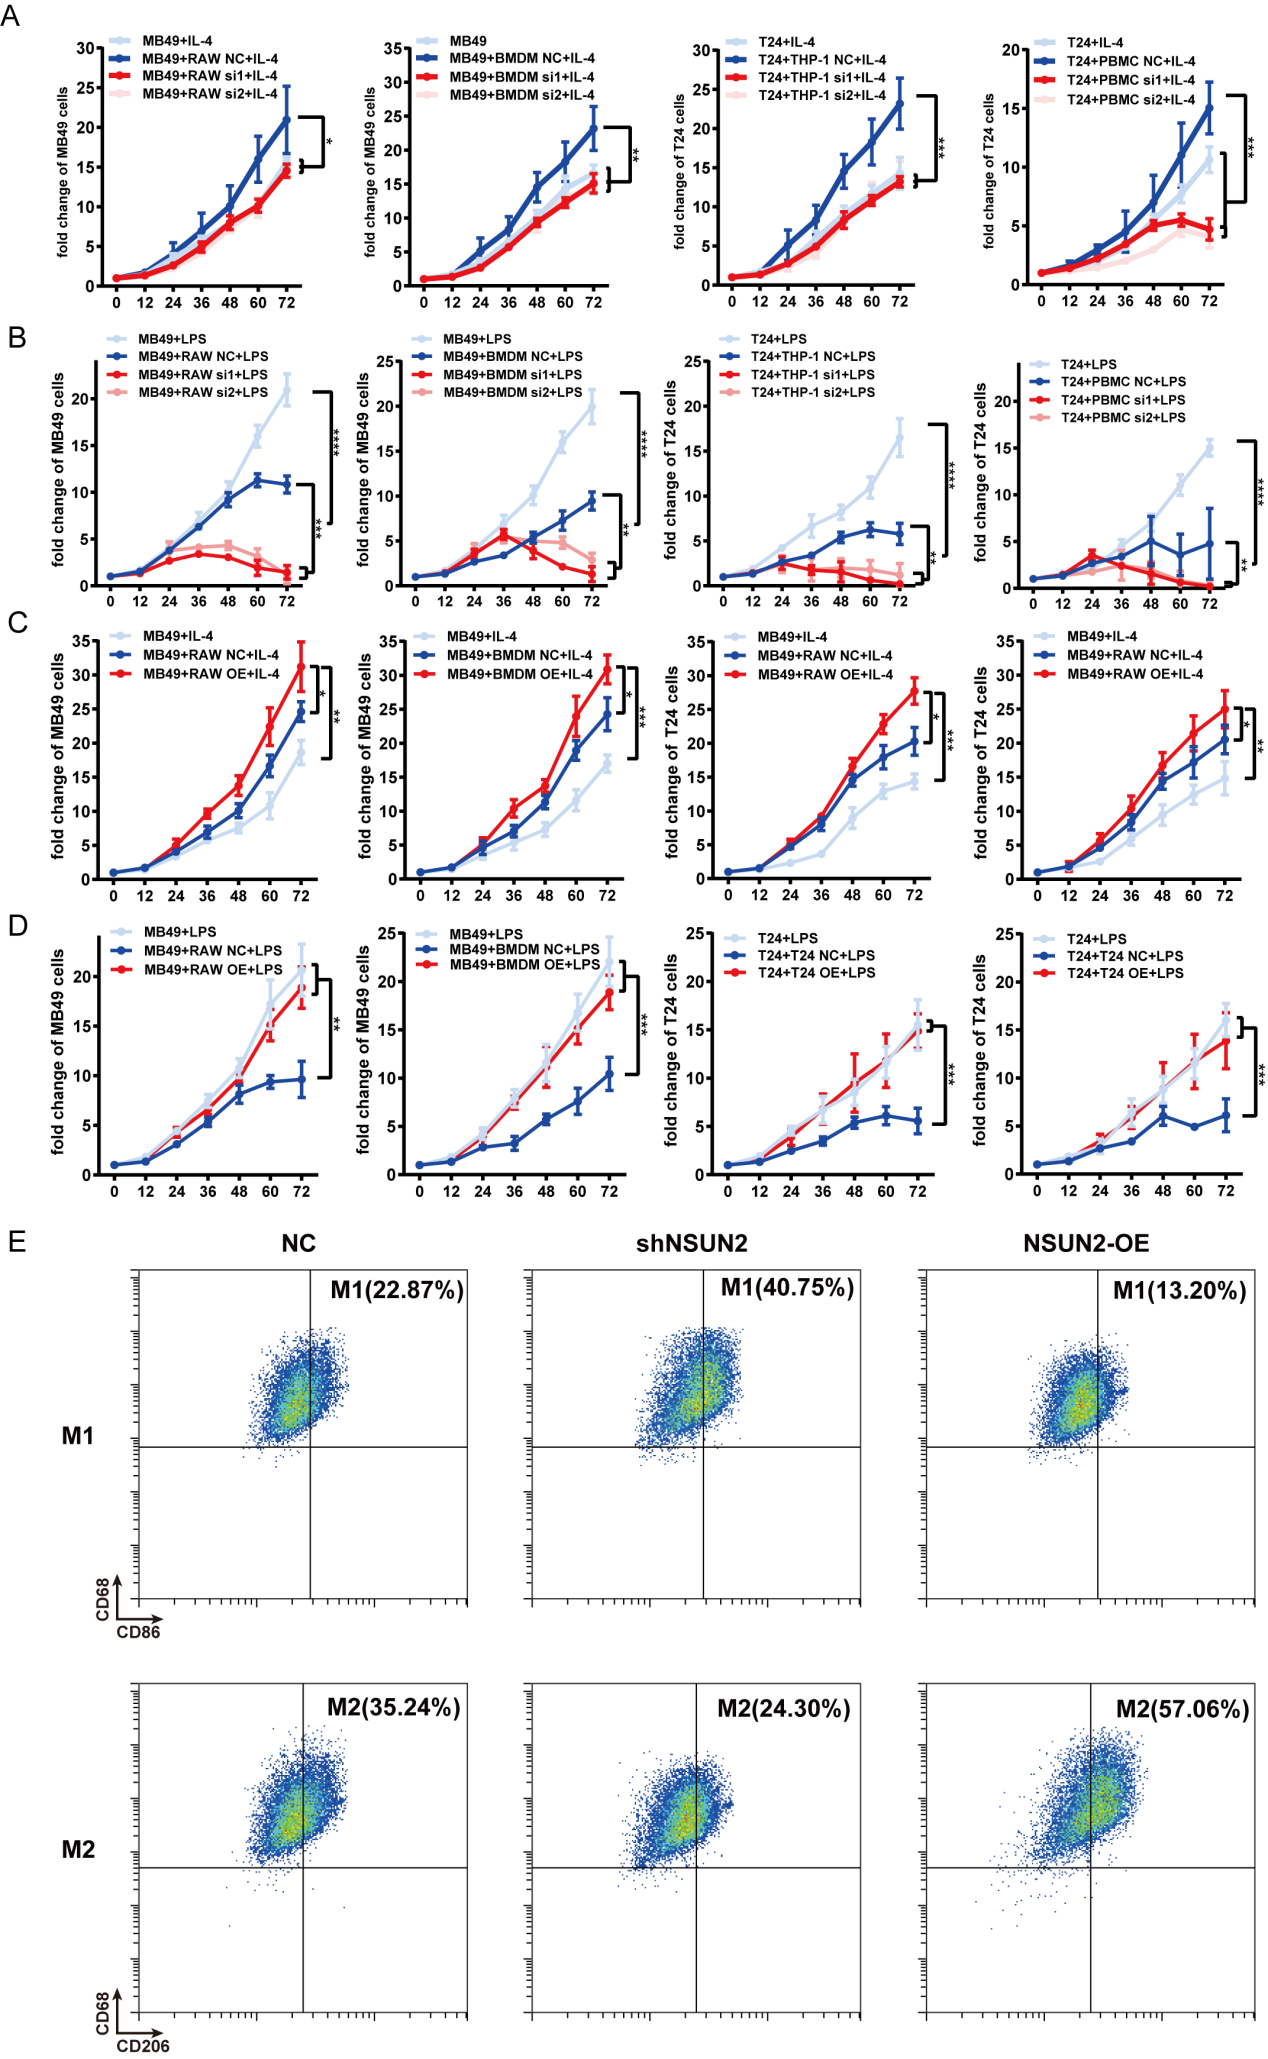
***

***Figure S2 The knock-down of NSUN2 inhibited the pro-tumor effect of M2 macrophages while promoted the anti-tumor effect of M1 macrophages.(A-B) On the other hand, the over-expression of NSUN2 showed opposite effect.(C-D) The flow cytometry of THP-1 showed that expression of NSUN2 affected the M1/M2 proprotion of THP-1 after induction of IL-4/LPS.(E)***

***
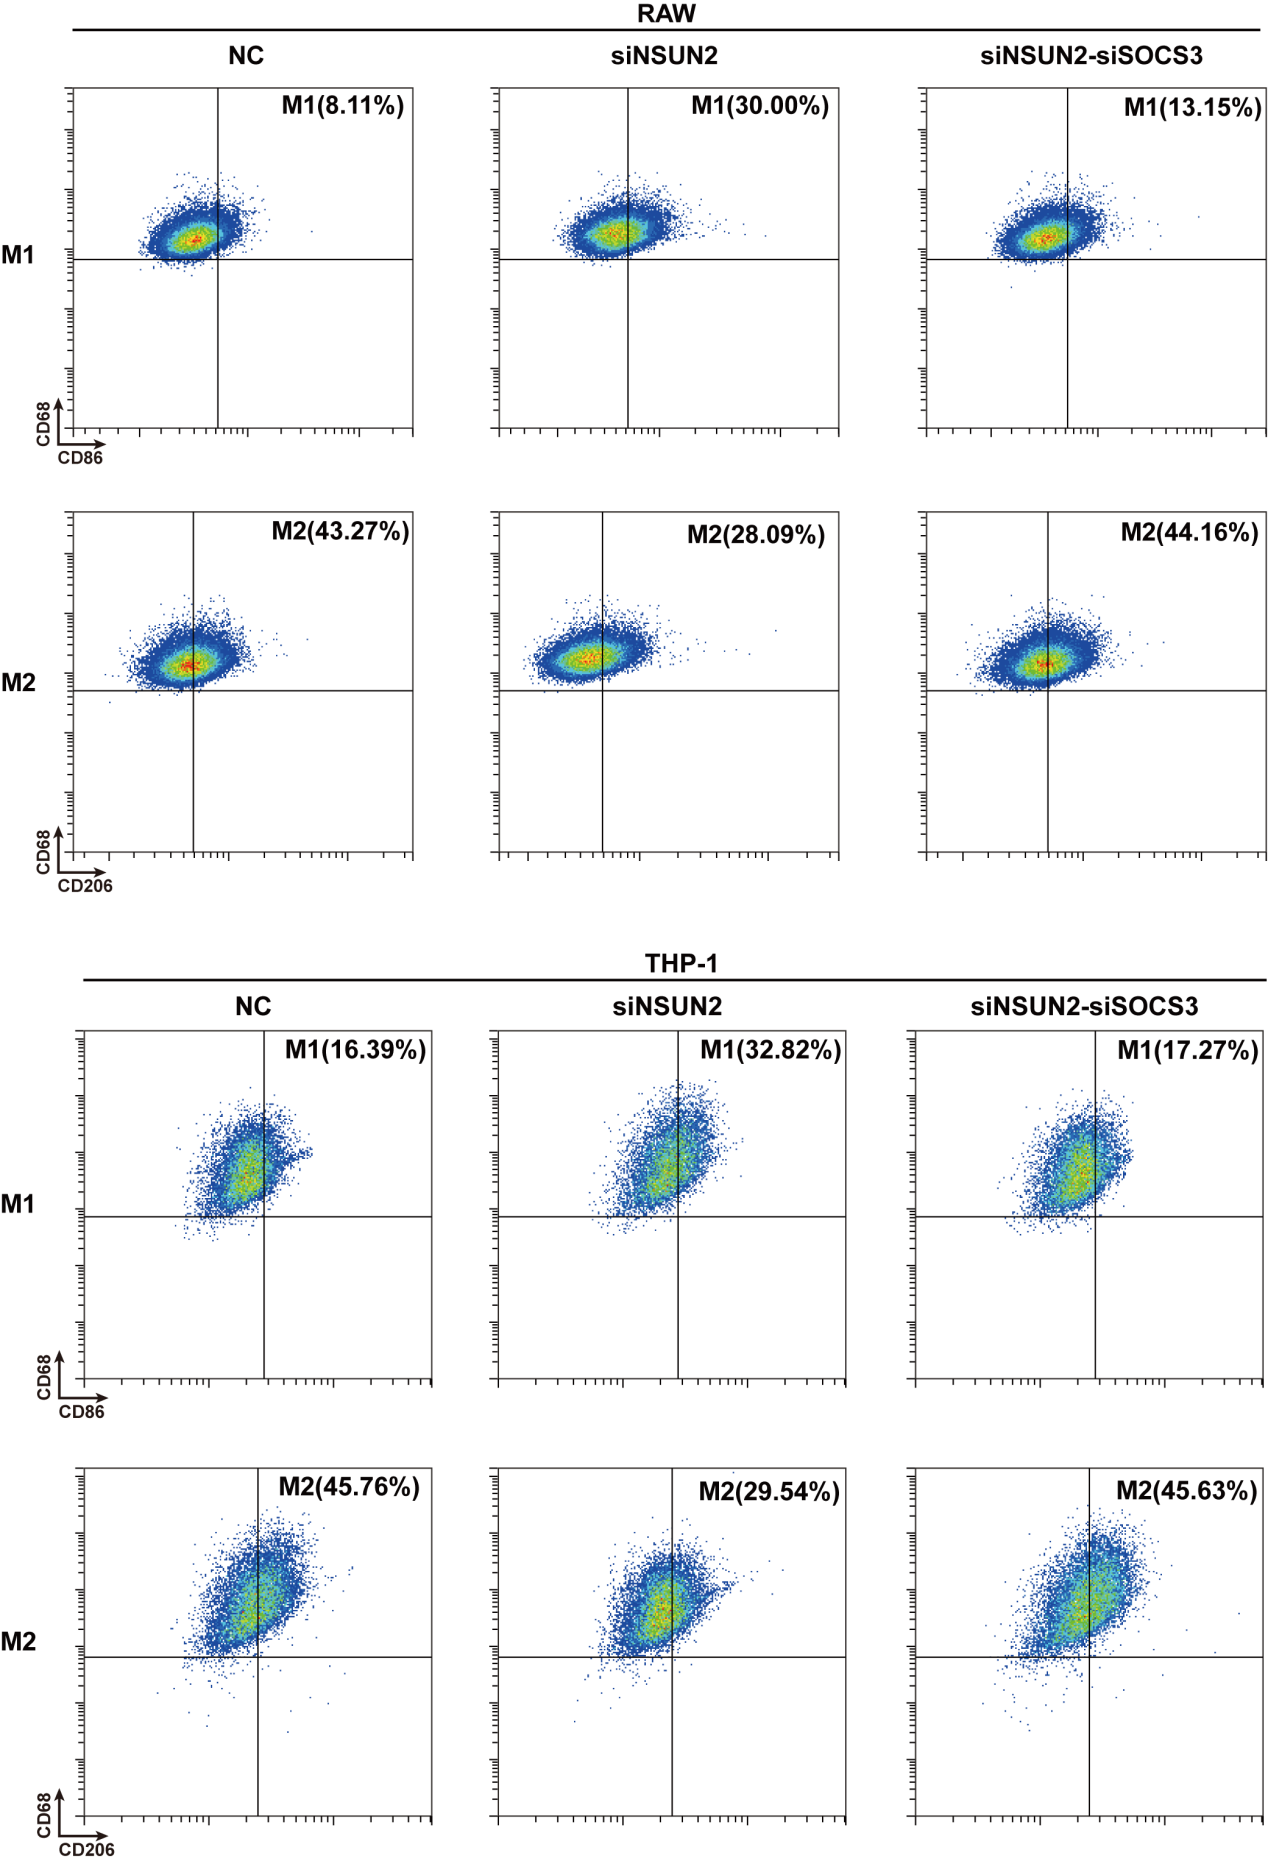
***

***Figure S3 The flow cytometry of THP-1 and RAW improved that knockdown of SOCS3 remodeled the polarization and ability of macrophages caused by NSUN2 inhibition.***

***
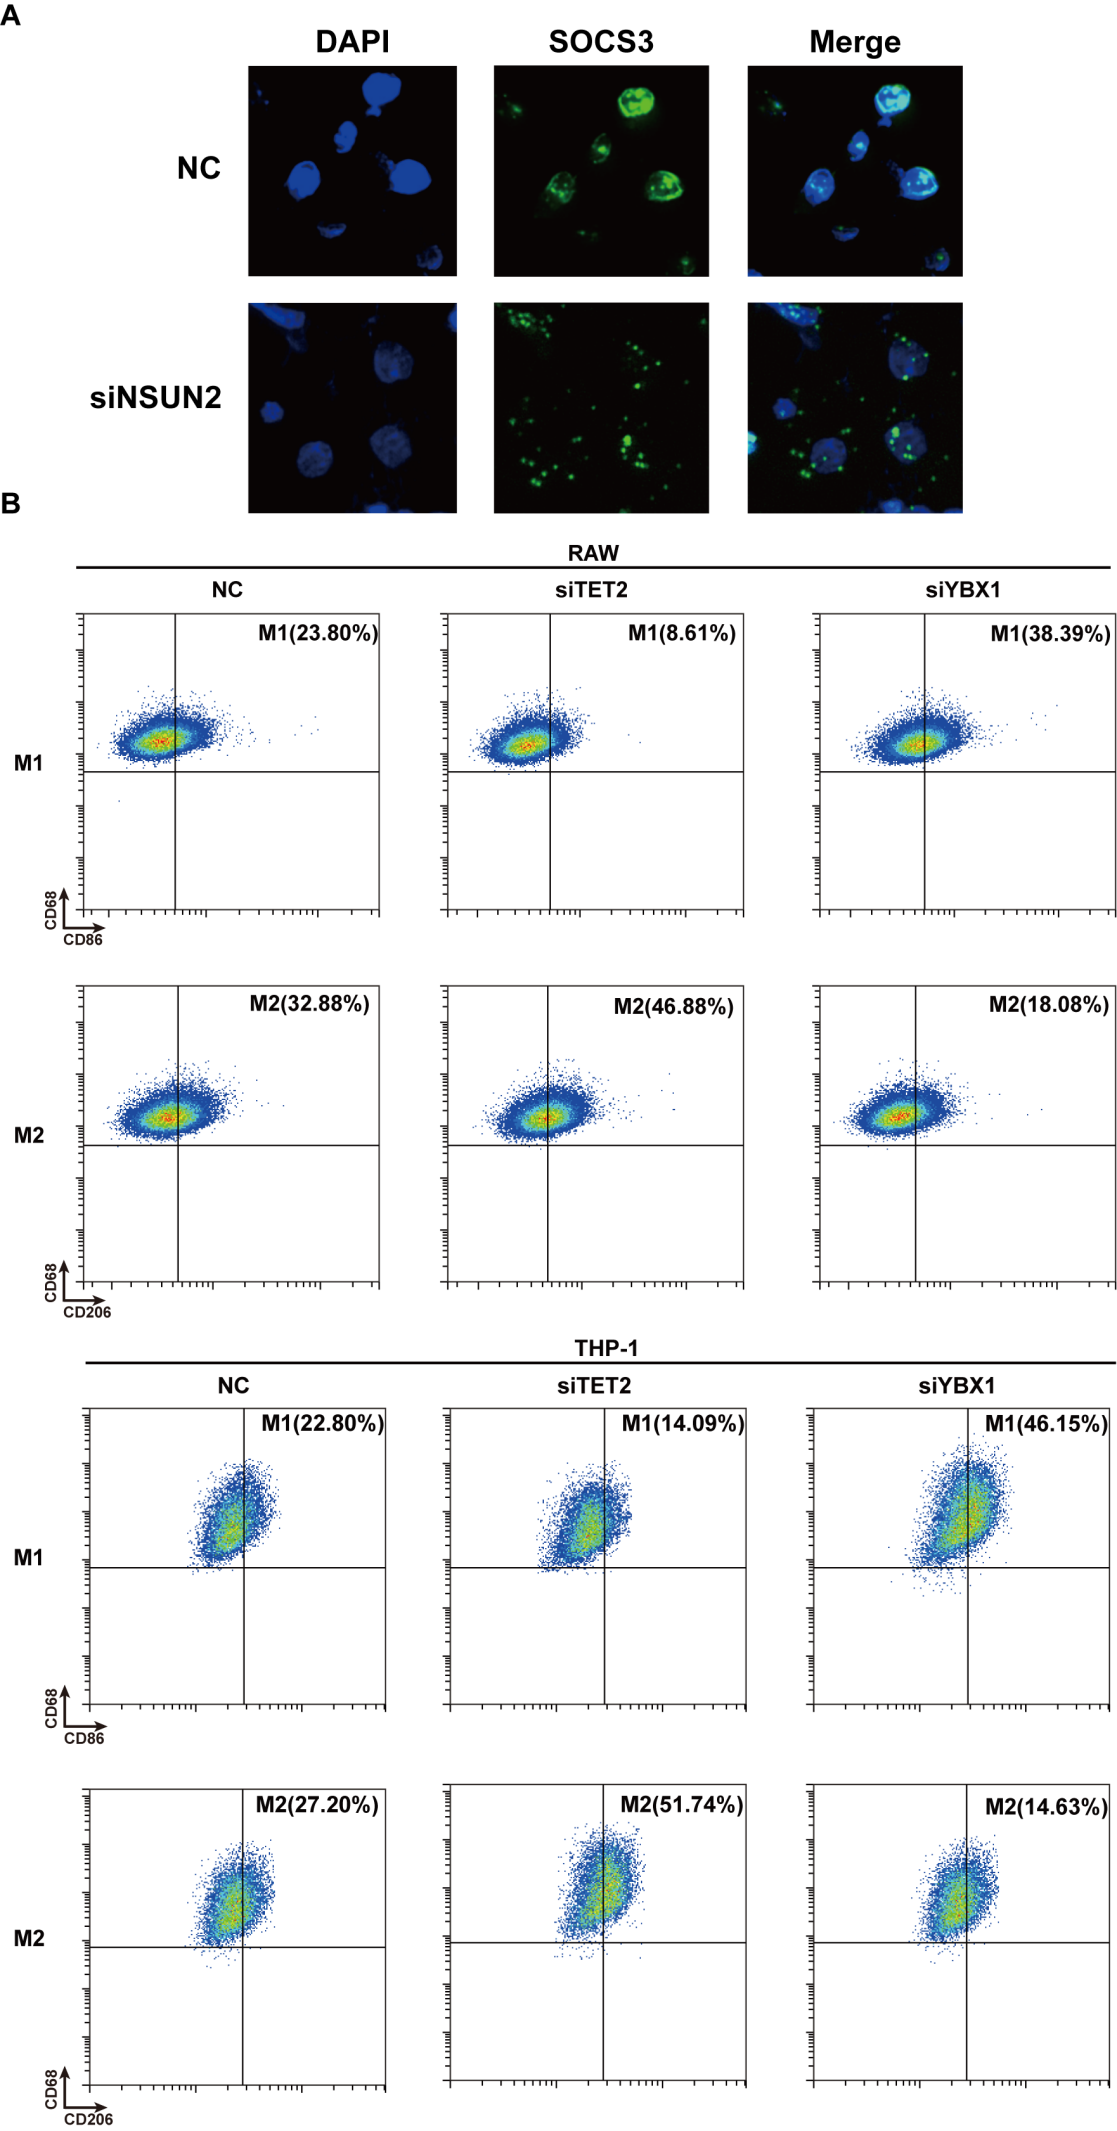
***

***Figure S4 The FISH analysis further confirmed that the knockdown of NSUN2 reduced the accumulation of SOCS3 mRNA in the nucleus.(A) The flow cytometry of THP-1 and RAW verified that knockdown of YBX1 promoted M1 polarization in macrophages and inhibited M2 polarization, whereas knockdown of TET2 had the opposite effect.***
